22 coding control region of 133 bp. The nucleotide composition includes 18.37% G, 23.79% C,  
23 26.84% A and 30.99% T. The A + T bias is 57.84%. Phylogenetic analysis based on 12  
24 complete mitochondrial genomes of sea urchins including four species of the family  
25 Diadematidae supported familial monophyly, however the two *Diadema* species, *D. antillarum*  
26 and *D. setosum* were not recovered as sister taxa.

## 27 **1. Introduction**

28 The long-spined black sea urchin, *Diadema antillarum* (Diadematoida, Diadematidae), is a  
29 marine benthic invertebrate that inhabits the shallow waters of the Western Atlantic Ocean and  
30 Caribbean Sea. It is an important herbivore and keystone species that helps maintain healthy  
31 coral reef systems along its coastal marine habitats (Liddell and Ohlhorst, 1986; Hughes et al.,  
32 1987; Carpenter, 1988, 1990; Hughes, 1994; Ferrari Legorreta, 2012; Vega Thurber et al., 2012;  
33 Burkepile et al., 2013; Steneck, 2020). After the human impact of overharvesting larger  
34 herbivorous fishes and the disappearance of larger vertebrates, *D. antillarum* were plentiful.  
35 Along with other smaller herbivore fishes they served as the primary grazers maintaining the  
36 health of a coral dominated reef system, up until the mid-1980s (Jackson, 2001; Pandolfi et al.,  
37 2003; Steneck, 2020). After the historic 1983–84 die-off event of this species presumably due to  
38 an unknown water borne pathogen, repeated die-off events occurred in the 1990s as well as in  
39 the current year (February - May, 2022, <https://www.agrra.org/sea-urchin-die-off/>; accessed May  
40 24, 2022). These events have collectively decimated, as well as wiped out populations in some  
41 localities across the Caribbean (Lessios, 1995; Lessios, 1988; Lessios, 2016). Monitoring and  
42 recovery efforts have been promising, but future die-off events will likely occur as global climate  
43 change continues (Hylkema et al., 2022; Pilnick et al., 2021; Williams, 2022).

44        Until now, only a few genes have been described in the mitochondrial genome of *D.*  
45        *antillarum*, including partial sequences of *COI*, *COII* and *ATP6*, as well as assembled sequences  
46        of *ATP8* and *tRNA<sup>Lys</sup>* (Lessios et al., 2001; Collin et al., 2020). While over 40 mitochondrial  
47        genomes of different sea urchin species have been completed so far, this includes only three  
48        species within the family Diadematidae, which contain 12 genera. Of these, both species of the  
49        genus *Echinothrix* have complete mitochondrial genomes in addition to one of the seven species  
50        within the genus *Diadema*, specifically *D. setosum*. In this study, we report the complete  
51        mitochondrial genome of *D. antillarum* and we explore the utility of whole mitochondrial  
52        genomes to place *D. antillarum* phylogenetically in the Diadematidae tree.

## 53        **2.        Data description**

### 54        *2.1 Sample collection and DNA extraction*

55        An adult sea urchin was collected in Puerto Rico (18°20'35.2"N 67°15'40.5"W). A sample  
56        containing whole coelomocytes was withdrawn from the animal through the Aristotle's Lantern  
57        using a sterile 23-gauge needle connected to a 5 mL syringe. The animal was photographed and  
58        then returned to its habitat at the collection site, thus, it was not retained as a voucher specimen  
59        for this study. The sample was held on ice during transport to the University of Puerto Rico  
60        Mayagüez (UPRM). Total DNA was extracted from coelomocytes per company instructions  
61        using an a DNeasy® Blood and Tissue Kit (Qiagen, Inc.). The sample quality and concentration  
62        were assessed using a NanoDrop 2000 spectrophotometer (Thermo Fisher Scientific) prior to  
63        shipment for sequencing at the Psomagen (Macrogen USA) laboratory in Rockville, Maryland.  
64        Approval for the sample collection was obtained from the Department of Natural and  
65        Environmental Resources of Puerto Rico (O-VS-PVS15-AG-00046-01082018).

## 66 2.2 Sequencing and bioinformatics analysis

67 To prepare the DNA sample for sequencing, a library of sequences was generated using a  
68 TruSeq® DNA PCR Free (350) library preparation kit (Illumina, Inc.). Quality and quantitation  
69 verification of libraries was performed using a Bioanalyzer. Next, an Illumina HiSeq 2500  
70 platform generated paired-end 151 bp sequence reads. The sequencer produced 60.8 GB of total  
71 reads and 402,874,618 paired-end reads of which 88.21% had a quality score of  $\geq$  Q30.

72 The raw read candidates for the mitochondrial genome were extracted bioinformatically from  
73 the total Illumina data that represented both nuclear and mitochondrial genomes using  
74 Cookiecutter software (Starostina et al., 2015). The reads were trimmed using a custom program  
75 called v2trim. Next, the list of kmers was formed in two stages. In the first stage we used the  
76 best-known reference genome of sea urchins (*Strongylocentrotus purpuratus*, NC\_001453.1,  
77 Jacobs et al., 1988) to assemble the draft mtDNA contigs of *D. antillarum* using SPAdes genome  
78 assembler. In stage two, the assembled contigs were searched with BLAST NCBI web interface  
79 to find the closest reference sequence, which matched to the species, *Echinothrix diadema*, with  
80 the accession number KX385836.1. In the second stage, we constructed the kmer list using this  
81 closest reference sequence. The extracted reads were then assembled with SPAdes v3.15.4 using  
82 the default parameters (Bankevich et al., 2012). To verify assembly quality the extracted reads  
83 were mapped back to the full length mtDNA assembly with bwa mem using the default  
84 parameters (Li, 2013). The coverage plot was computed with bedtools genomecov with -d and -  
85 split parameters (Aaron et al., 2010). In addition, a per-base coverage data table was generated  
86 using the NGS data analysis tools provided in the Unipro UGENE software program  
87 (Okonechnikov et al. 2012). A graph of this data table was generated in Microsoft Excel (2019)  
88 and is presented as **Supplemental Figure 1**. Finally, the assembly start was rotated to tRNA-

89 Phe. Following assembly, an online annotation was performed using the MITOS web server  
90 (<http://mitos.bioinf.uni-leipzig.de/index.py>) with following manual verification of each predicted  
91 RNA and protein. The results from this annotation were used to generate a mitochondrial map in  
92 Geneious Prime v2022.1.1 (**Figure 1**). The extracted reads, bam,coverage files and the  
93 reproducible commands list are available in our GitHub repository:  
94 [https://github.com/aglabx/mtDNA\\_assembly/tree/master/Diadema\\_anthilarum](https://github.com/aglabx/mtDNA_assembly/tree/master/Diadema_anthilarum).

### 95 *2.3 Phylogenetic analysis*

96 Alignment and phylogenetic analysis were constructed in MEGA v11.0.11 (Tamura et al.  
97 2021). Analysis included the complete mitochondrial genomes of 12 representative species from  
98 the orders Camarodonta (families Temnopleuridae, Echinometridae and Parechinidae),  
99 Arbacioida (family Arbaciidae), Temnopleuroida (family Toxopneustidae), Cidaroida (family  
100 Cidaridae), Echinoida (family Strongylocentrotidae), and Diadematoida (family Diadematidae)  
101 plus the sea cucumber, *Apostichopus japonicus*. A MUSCLE alignment method was  
102 implemented using the default parameters in the MEGA11 program. Another sequence  
103 alignment editor, BioEdit, was used to generate a sequence identity matrix of the aligned  
104 sequences (Hall, T.A., 1999). We performed an IQ-TREE analysis to determine the best-fit  
105 model of substitution among the mitogenome sequences (Nguyen et al 2015). A maximum  
106 likelihood tree (ML) was generated with the mitogenome nucleotide DNA sequences of the 12  
107 sea urchin species and the sea cucumber that was included as an outgroup. We settled upon a  
108 comprehensive model of parameters for the phylogenetic analysis that resulted in branches  
109 containing the best supported bootstrap values (out of 500 bootstrap iterations) for the resulting  
110 consensus tree. The ML tree was generated using a Tamura-Nei model of evolution (Tamura  
111 and Nei, 1993). A discrete Gamma distribution was used to model evolutionary rate differences

112 among sites (5 categories (+G, parameter = 0.3129)). Initial tree(s) for the heuristic search were  
113 obtained automatically by applying Neighbor-Join and BioNJ algorithms to a matrix of pairwise  
114 distances estimated using the Tamura-Nei model, and then the ML tree was generated by  
115 selecting the topology with superior log likelihood value. Additional sequence alignments and  
116 phylogenetic analysis was performed on available sequences for *Echinothrix* spp. and *Diadema*  
117 spp. for each of the three genes: 16S ribosomal RNA (partial sequence), ATPase genes  
118 (including ATP synthase subunit 6 gene partial coding sequence and tRNA-Lys gene partial  
119 sequence ATP8 gene complete coding sequence and ATP6 gene partial coding sequence) and  
120 cytochrome oxidase subunit 1 (CO1) (partial coding sequence). For these additional analyses, a  
121 MUSCLE alignment was generated using the default parameters in the MEGA11 program. In  
122 addition, we extracted the portions of the mitogenome for *E. diadema* (KX385836), *D. setosum*  
123 (KX385835) and *D. antillarum* (present study) that corresponded to each gene, by generating an  
124 initial alignment using available sequences from the same genera for each of the three genes. A  
125 ML tree was obtained for each gene using a bootstrapped (500 iterations) general time reversible  
126 (GTR) model with invariant (I) substitution rates among the nucleotides. The initial trees were  
127 obtained by applying Neighbor-Join and BioNJ algorithms to a matrix of pairwise distances  
128 estimated using the Tamura-Nei model, and then the ML tree was generated by selecting the  
129 topology with superior log likelihood value.

130

## 131 **Results**

### 132 *3.1 Signatures of the mitogenome*

133 The circular mitogenome of *D. antillarum* is 15,708 bp in length, which consists of 2 rRNA  
134 genes, 22 tRNA genes, a non-coding control region, and 13 protein-coding genes that are  
135 common in other echinoderms, as well as the order of the genes (Bronstein and Kroh 1999,

136 Ketchum et. al. 2018, De Giorgi et. al. 1996). Most of the genes are encoded on the H-strand  
137 except for one protein-coding gene, *ND6*, and five tRNA genes, including *tRNA<sup>Pro</sup>*, *tRNA<sup>Leu</sup>*, *tRNA<sup>Val</sup>*,  
138 *tRNA<sup>Met</sup>*, and *tRNA<sup>Arg</sup>*, which are encoded on the L-strand (Bernt et al. 2013). Most of the protein-  
139 coding genes use the start codon ATG, with the exception of the *ATP8* gene, which starts with  
140 GTG. The length of the rRNA genes is 896 bp for *12S rRNA* and 1555 bp *16S rRNA*. The  
141 control region is 133 bp in length and contains the typical G repeat that is found in other  
142 echinoderms. This non-coding region is located at base positions 1111 to 1243, and is positioned  
143 in between the genes *tRNA<sup>Pro</sup>* and *tRNA<sup>Leu</sup>*.

144 The composition of the nucleotides for the mitogenome of *D. antillarum* was calculated in the  
145 MEGA11 program, and includes 18.37% G, 23.79% C, 26.84% A and 30.99% T. The A + T bias  
146 was also calculated in MEGA, which is 57.84% for *D. antillarum*, slightly lower but comparable  
147 to that of *D. setosum*, which is 58.19%. In comparison to the two other *Echinothrix* species in  
148 the same family as *D. antillarum*, the A + T bias in the mitogenome of *D. antillarum* is slightly  
149 higher than that of *E. diadema* (57.61%) and *E. calamaris* (56.43%). Nonetheless, when  
150 compared to species in different orders, the mitochondrial A + T bias of *D. antillarum* is  
151 generally lower than other species in the following orders: Cidaroida (*Stylocidaris reini*, 59.93%;  
152 *Prionocidaris baculosa*, 59.14%; *Eucidaris tribuloides*, 59.70%), Camarodonta (*Echinometra*  
153 *mathaei*, 59.21%; *Heterocentrotus mamillatus*, 58.91%; *Heliocidaris crassispina*, 58.89%), and  
154 Echinoida (*Strongylocentrotus droebachiensis*, 58.96%; *S. intermedius*, 58.92%; *S. purpuratus*,  
155 58.98%).

### 156 3.2 Phylogenetic tree

157 The bootstrap consensus ML tree is shown in **Figure 2**, which was inferred from 500  
158 replicates through clustering of the associated taxa (Felsenstein, 1985). The results of the IQ-

159 TREE analysis indicated that the best model of substitution was the most comprehensive model  
160 tested, the GTR+F+R2 model (General time reversible model with unequal rates and unequal  
161 base frequency with FreeRate rate heterogeneity model) (Tavaře 1986). The results of this test  
162 included a ML tree lacking a bootstrap analysis, which is available on the GitHub repository site  
163 listed above. In addition, a ML tree was generated in the MEGA11 program using the suggested  
164 GTR model of evolution with invariant (or unequal) substitution rates among sites (tree not  
165 shown). The two resulting ML consensus trees from the MEGA11 program plus the ML tree  
166 generated by the IQ-TREE analysis had identical topologies with regards to the species within  
167 the family Diadematidae. Of the two bootstrapped ML trees produced in MEGA, the tree  
168 presented in this study generally showed higher bootstrap values for all branches within the tree.

169 Interestingly, the tree topology shown in this study indicated that *D. antillarum* was more  
170 closely related to *E. diadema* than to *D. setosum*. The next most closely related taxon to these  
171 three was *E. calamaris*. For *E. diadema*, *E. calamaris* and *D. setosum*, the length of these  
172 mitochondrial genomes are 15,712 bp, 15,716 bp and 15,708 bp, respectively. A previous study  
173 reporting the complete mitogenome of *D. setosum* included a maximum likelihood phylogenetic  
174 tree with a highly supported sister clade (bootstrap value of 100) containing two taxa: *E.*  
175 *diadema* and *D. setosum* (Li et al., 2016). Furthermore, the results of our sequence identity  
176 matrix of mitogenomes between *D. antillarum* and *E. diadema* was 96.7% identical, whereas, *D.*  
177 *antillarum* vs. *D. setosum* or *D. antillarum* vs. *E. calamaris* was 86.3% and 80% identity,  
178 respectively. Additionally, the mitogenomes between *E. diadema* and *D. setosum* was 86.2%  
179 identical in sequence. One may suggest that the overall higher similarity between *D. antillarum*  
180 and *E. diadema*, as opposed to *D. setosum* may be due to the higher A + T bias in the  
181 mitogenome. However, the mitogenome sequences of *E. diadema* and *D. setosum* were



182 generated from specimens collected from the South China Sea from the same research group (Li,  
183 Wu, Fu, and Zeng, 2016 unpublished, Li et. al., 2016). Given that there are other *Diadema*  
184 species in the South China Sea that are generally similar morphologically to *E. diadema*  
185 (including *D. setosum* and *D. savignyi*) the reported mitogenome of *E. diadema* may have  
186 actually been sampled from a *Diadema* species, namely *D. savignyi*. Unfortunately, the  
187 mitogenome has not been completed or otherwise available for *D. savignyi*. Nonetheless, to  
188 provide evidence for this claim we performed sequence analysis for three additional genes (*16S*,  
189 *ATPase* and *COI*) for available data from species of the genera *Echinothrix* and *Diadema*.  
190 Results of the tree topologies for all three genes indicate that the specific gene sequences  
191 extracted from the mitogenome of *E. diadema* were more closely related to the particular gene  
192 sequences of *Diadema* spp. as opposed to those from *Echinothrix* spp. (**Supplemental Figures**  
193 **2, 3, and 4**). In particular, the specific gene sequences that were extracted from the mitogenome  
194 of *E. diadema* were placed as a sister clade with *D. savignyi* (see Supplemental Figures 2, 3, and  
195 4), which was placed next to a larger group of clades that included *D. africanum* (see  
196 Supplemental Figure 2), *D. antillarum* (see Supplemental Figures 2, 3, and 4) *D. mexicanum* (see  
197 Supplemental Figure 2) and *D. setosum* (see Supplemental Figures 2, 3, and 4). This was more  
198 distantly related to groupings of clades that included *E. diadema* (see Supplemental Figures 2)  
199 and *E. calamaris* (see Supplemental Figures 2, 3, and 4).

200 Furthermore, it is important to note that the habitat ranges of both *E. diadema* and *D. setosum*  
201 are in the Indo-Pacific region which is distinct from the habitat range of *D. antillarum*, which are  
202 typically found in the western Atlantic Ocean, the Caribbean Sea, the tropical coasts of South  
203 America down to Brazil, and from Bermuda to Florida. The authors are aware that a new  
204 subspecies of *D. antillarum*, called *D. antillarum ascensionis* has been recently identified in the

205 eastern Atlantic, which is similar to the mid-Atlantic species of *D. antillarum* (Rodriguez, et al.  
206 2013). This new subspecies is also similar to *D. africanum* that are found in the Eastern Atlantic  
207 islands, from Madeira Islands to the Guinean Gulf including Salvage Islands, Canary Islands,  
208 Cape Verde Islands (Hernández et al. 2008), and São Tome Island (Lessios et al. 2001). While  
209 *D. antillarum* have been repopulating areas, which have extended their previous habitat range,  
210 we are not aware of any *D. africanum* that has migrated as far west as Puerto Rico, in the  
211 Caribbean Sea. In addition, when identifying the specimen prior to collection for this study, it  
212 lacked the typical iridophores that are identifiable in the sunlight of *D. africanum*. While the  
213 *ATPase* sequence analysis presented in this study does reflect that there are similarities in these  
214 sequence between *D. antillarum*, *D. africanum* and *D. mexicanum*, the *ATPase* gene sequence  
215 that was extracted from the mitogenome used in this analysis most closely resembles that of  
216 another *D. antillarum* (see Supplemental Figure 2). Thus, the authors think that the species used  
217 in this study has been correctly identified. Yet, as additional mitogenome sequences become  
218 available, the phylogenetic tree describing the relationships between genera within Diadematidae  
219 should become more thorough.

220 In conclusion, these results may provide some insight into the dispersal and speciation events  
221 of the family Diadematidae. However, more data is needed from other genera to draw further  
222 conclusions about the evolution and adaptation of this family lineage. The mitogenome  
223 sequence produced through this study can serve as a reference sequence for this species of sea  
224 urchin. In addition, the nuclear sequences generated in this study will be included in a larger  
225 study to assembly the whole genome for this species. Moreover, given the necessity of *D.*  
226 *antillarum* for maintaining the health and current structure of the remaining coral dominated

227 coastlines in the face of global climate change, the genetics of this species will be likely  
228 important to include in future conservation and population genetics studies.

### 229 **3. Data accessibility**

230 The mitochondrial genome sequence has been deposited at DDBJ/ENA/GenBank under the  
231 accession number ON725136 (pending; submitted on May 19, 2022). The data is linked to the  
232 NCBI BioProject and BioSample numbers PRJNA839760 and SAMN28553754, respectively.  
233 All intermediate files are available in our GitHub repository:  
234 [https://github.com/aglabx/mtDNA\\_assembly/tree/master/Diadema\\_anthilarum](https://github.com/aglabx/mtDNA_assembly/tree/master/Diadema_anthilarum).

### 235 **Declaration of Competing Interest**

236 The authors declare that there is no conflict of interests regarding the publication of this  
237 article.

### 238 **Acknowledgements**

239 Funding for the project was provided by start-up funds granted to Tarás Oleksyk by Oakland  
240 University.

### 241 **References**

- 242 1. Bankevich, A., Nurk, S., Antipov, D., Gurevich, A. A., Dvorkin, M., Kulikov, A. S.,  
243 Lesin, V., Nikolenko, S., Pham, S., Prjibelski, A., Pyshkin, A., Sirotkin, A., Vyahhi, N.,  
244 Tesler, G., Alekseyev, M.A., Pevzner, P. A. SPAdes: a new genome assembly algorithm  
245 and its applications to single-cell sequencing. *Journal of computational biology*. 2012.  
246 19(5): 455-477.

- 247 2. Bernt, M., Donath, A., Jühling, F., Externbrink, F., Florentz, C., Frittsch, G., Pütz, J.,  
248 Middendorf, M. and Stadler, P. F. MITOS: Improved de novo Metazoan Mitochondrial  
249 Genome Annotation. *Molecular Phylogenetics and Evolution*. 2013. 69(2):313-319
- 250 3. Bronstein, O. and Kroh, A. The first mitochondrial genome of the model echinoid  
251 *Lytechinus variegatus* and insights into Odontophoran phylogenetics. *Genomics*. 2018.  
252 111 (4) DOI:[10.1016/j.ygeno.2018.04.008](https://doi.org/10.1016/j.ygeno.2018.04.008)
- 253 4. Burkepile, D.E., Allgeier, J.E., Shantz, A.A., Pritchard, C.E., Lemoine, N.P., Bhatti,  
254 L.H., and Layman, C.A. Nutrient supply from fishes facilitates macroalgae and  
255 suppresses corals in a Caribbean coral reef ecosystem. *Scientific Reports*. 2013. 3(1493):  
256 1–9.
- 257 5. Cantatore, P., Roberti, M., Rainaldi, G., Gadaleta, M.N. and Saccone, C. The complete  
258 nucleotide sequence, gene organization, and genetic code of the mitochondrial genome of  
259 *Paracentrotus lividus*. *J. Biol. Chem.* 264 (19), 10965-10975 (1989)
- 260 6. Carpenter, R.C. Mass mortality of a Caribbean sea urchin: Immediate effects on  
261 community metabolism and other herbivores. *Proceedings of the National Academy of*  
262 *Sciences*. 1988. 85: 511–514.
- 263 7. Carpenter, R.C. Mass mortality of *Diadema antillarum*—I. Long-term effects on sea  
264 urchin population dynamics and coral reef algal communities. *Marine Biology*. 1990.104:  
265 67–77
- 266 8. Collin, R., Venera-Ponton, D.E., Driskell, A.Cio, Boyle M.J., Lessios, H.A. DNA  
267 barcoding of echinopluteus larvae uncovers cryptic diversity in neotropical echinoids.  
268 *Invertebrate Biology*. 2020. 139 (2) <https://doi.org/10.1111/ivb.12292>

- 269 9. De Giorgi, C., Martiradonna, A., Lanave, C. and Saccone, C. Complete sequence of the  
270 mitochondrial DNA in the sea urchin *Arbacia lixula*: conserved features of the echinoid  
271 mitochondrial genome. *Molecular Phylogenetics and Evolution*. 1996. 5: 323-332.
- 272 10. Felsenstein, J. Confidence limits on phylogenies: An approach using the bootstrap.  
273 *Evolution*. 1985. 39:783-791.
- 274 11. Ferrari Legorreta, R. Building resilience of Caribbean coral reefs to macroalgal phase  
275 shifts: Identifying key habitat features. PhD Thesis, School of Biological Sciences, The  
276 University of Queensland, Australia. 2012  
277 Hughes, T.P. Catastrophes, phase shifts, and  
278 large-scale degradation of a Caribbean coral reef. *Science*. 1994. 265: 1547–1551.
- 279 12. Hernandez, J.C., Clemente, S., Sangil, C., and Brito, A. 2008. Actual status of the sea  
280 urchin *Diadema aff. Antillarum* populations and macroalgal cover in the Marine  
281 Protected Areas comparing to a highly fished area (Canary Islands-Eastern Atlantic  
282 Ocean). 2008. *Aquatic Conservation: Marine and Freshwater Research*. 66. 259-270.
- 283 13. Hughes, T.P., Reed, D.C., and Boyle, M.-J. Herbivory on coral reefs: Community  
284 structure following mass mortalities of sea urchins. *Journal of Experimental Marine  
285 Biology and Ecology*. 1987. 113: 39–59
- 286 14. Hylkema, A., Debrot, A.O., Pistor, M., Postma, E., Williams, S.M. and Kitson-Walters,  
287 K., High peak settlement of *Diadema antillarum* on different artificial collectors in the  
288 Eastern Caribbean. *Journal of Experimental Marine Biology and Ecology*. 2022. 549  
289 p.151693.
- 290 15. Jackson, J.B.C. What was natural in the coastal oceans? *Proceedings of the National  
291 Academy of Sciences*. 2001. 98(10): 5411–5418

- 291 16. Jacobs, H. T., Elliott, D. J., Math, V. B., Farquharson, A. Nucleotide sequence and gene  
292 organization of sea urchin mitochondrial DNA. *Journal of molecular biology*. 1988.  
293 202(2): 185-217.
- 294 17. Ketchum, R.N, DeBiase, M.B., Ryan, J.F., Burt, J.A. and Reitzel, A.M. The complete  
295 mitochondrial genome of the sea urchin, *Echinometra* sp. EZ. *Mitochondrial DNA B*,  
296 *Resour.* 2018. 3(2) 1225-1227.
- 297 18. Laruson,A.J. Rates and relations of mitochondrial genome evolution across the  
298 Echinoidea, with special focus on the superfamily Odontophora *Ecol Evol* 7 (13), 4543-  
299 4551 (2017)
- 300 19. Lessios, H.A., Kessing, B.D., Pearse, J.S. Population structure and speciation in tropical  
301 seas: global phylogeography of the sea urchin *Diadema*. *Evolution*. 2001. 55(5):955-75.
- 302 20. Lessios, H.A., Kessing, B.D., Robertson, D.R. Massive gene flow across the world's most  
303 potent marine biogeographic barrier. *Proceedings of the Royal Society of London. Series*  
304 *B: Biological Sciences*. 1998. 265(1396):583-8.
- 305 21. Lessios, H.A. *Diadema antillarum* 10 years after mass mortality: Still rare, despite help  
306 from a competitor. *Proceedings of the Royal Society B: Biological Sciences, B*. 1995.  
307 (259) 331-337.
- 308 22. Lessios, H.A. The Great *Diadema antillarum* Die-Off: 30 Years Later. *Annual Review of*  
309 *Marine Science*. 2016. 8:267–83
- 310 23. Li, C., Wu, G., Fu, W. and Zeng, X. The complete mitochondrial genome of *Diadema*  
311 *setosum* (Aulodonta: diadematidae). *Mitochondrial DNA Part B, Resources*. 2016. 1 (1):  
312 873-874

- 313 24. Li, H. Aligning sequence reads, clone sequences and assembly contigs with BWA-MEM.  
314 *arXiv preprint*. 2013. arXiv: 1303.3997.
- 315 25. Liddell, W.D. and Ohlhorst, S.L. Changes in benthic community composition following  
316 the mass mortality of *Diadema* at Jamaica. *Journal of Experimental Marine Biology and*  
317 *Ecology*. 1986. 95 (3): 271–278
- 318 26. Nguyen, L-T., Schmidt, H.A., von Haeseler, A., and Minh, B.Q. IQ-TREE: A fast and  
319 effective stochastic algorithm for estimating maximum-likelihood phylogenies.  
320 *Molecular Biology and Evolution*. 2015. 32(1) 268–274.
- 321 27. Okonechnikov, K., Golosova, O., Fursov, M., and the UGENE team. Unipro UGENE: a  
322 unified bioinformatics toolkit. *Bioinformatics*. 2012. 28(8) 1166-1167.
- 323 28. Pandolfi, J.M., Bradbury, R.H, Sala, E., Hughes, T.P., Bjorndal, K.A., Cooke, R.G.,  
324 McArdle, D., McClenachan, L., Newman, M.J., Paredes, G., and Warner, R.R. Global  
325 trajectories of the long-term decline of coral reef ecosystems. *Science*. 2003. 301(5635):  
326 955–958
- 327 29. Pilnick, A.R., O’Neil, K.L., Moe, M. and Patterson, J.T. A novel system for intensive  
328 *Diadema antillarum* propagation as a step towards population enhancement. *Scientific*  
329 *Reports*. 2021. 11(1), pp.1-13. <https://www.nature.com/articles/s41598-021-90564-1.pdf>
- 330 30. Quinlan, A. R., Hall, I. M. BEDTools: a flexible suite of utilities for comparing genomic  
331 features. *Bioinformatics*. 2010. 26(6): 841-842.
- 332 31. Qureshi,S.A. and Jacobs,H.T. Two distinct, sequence-specific DNA-binding proteins  
333 interact inddependently with the major replication pause region of sea urchin mtDNA  
334 *Nucleic Acids Res*. 21 (12), 2801-2808 (1993)

- 335 32. Rodriguez A., Hernandez, J.C., Clement, S., Coppard, S.E. A new species of *Diadema*  
336 (Echinodermata: Echinoidea: Diadematidae) from the eastern Atlantic Ocean and a  
337 neotype designation of *Diadema antillarum* (Philippi, 1845). 2013. *Zootaxa* 3636 (1)  
338 144-170.
- 339 33. Starostina, E., Tamazian, G., Dobrynin, P., O'Brien, S., Komissarov, A. Cookiecutter: a  
340 tool for kmer-based read filtering and extraction. *BioRxiv*. 2015. 024679.  
341 <https://doi.org/10.1101/024679>
- 342 34. Steneck, R.S. Sea urchins as drivers of shallow water benthic community structure. In  
343 *Sea Urchins: Biology and Ecology*, Lawrence, J.M. (ed.). 2020. pp. 195–212. Academic  
344 Press, San Diego, California
- 345 35. Sun,X.-J., Li,Q. and Kong,L.-F. Comparative mitochondrial genomics within sea  
346 cucumber(*Apostichopus japonicus*): Provide new insights into relationships among color  
347 variants. *Aquaculture* 309 (1-4), 280-285 (2010)
- 348 36. Tamura K. and Nei M. Estimation of the number of nucleotide substitutions in the control  
349 region of mitochondrial DNA in humans and chimpanzees. *Molecular Biology and*  
350 *Evolution*. 1993. 10:512-526.
- 351 37. Tamura, K., Stecher, G., Kumar, S. MEGA11: Molecular evolutionary genetics analysis  
352 version 11. *Molecular Biology and Evolution*. 2021. 38 (7) 3022-3027.
- 353 38. Tava re, S. Some probabilistic and statistical problems in the analysis of DNA sequences.  
354 *Lectures on Mathematics in the Life Sciences*. 1986. 17:57-86
- 355 39. Valverde,J.R., Marco,R. and Garesse,R. A conserved heptamer motif for ribosomal RNA  
356 transcription termination in animal mitochondria *Proc. Natl. Acad. Sci. U.S.A.* 91 (12),  
357 5368-5371 (1994)



- 358 40. Vega Thurber, R., Burkepile, D.E., Correa, A.M.S., Thurber, A.R, Shantz, A.A., Welsh,  
359 R., Pritchard, C., and Rosales, S. Macroalgae decrease growth and alter microbial  
360 community structure of the reef-building coral, *Porites astreoides*. *PLoS One*. 2012. 7(9):  
361 e44246
- 362 41. Wakayama,N., Kiyono,Y., Matsumoto,N., Saitoh,M. and Kanazawa,K. Effective DNA  
363 extraction methods for mitochondrial phylogenomics of the sea urchins. *Zoosymposia* 15  
364 (1), 192-202 (2019)
- 365 42. Williams, S.M., The reduction of harmful algae on Caribbean coral reefs through the  
366 reintroduction of a keystone herbivore, the long-spined sea urchin *Diadema antillarum*.  
367 *Restoration Ecology*. 2022. 30(1), p.e13475.

**The first complete mitochondrial genome of *Diadema antillarum* (Diadematoida,  
Diadematidae)**

Audrey J. Majeske<sup>a,b</sup>, Alejandro J. Mercado Capote<sup>a</sup>, Aleksey Komissarov<sup>c</sup>, Anna Bogdanova<sup>c</sup>,  
Nikolaos V. Schizas<sup>d</sup>, Stephanie O. Castro Márquez<sup>a</sup>, Kenneth Hilkert<sup>a</sup>, Walter Wolfsberger<sup>a</sup>,  
and Tarás K. Oleksyk<sup>a,b,\*</sup>

<sup>a</sup>University of Puerto Rico at Mayagüez, Department of Biology, Call Box 9000, Mayagüez, PR 00681, U.S.A.

<sup>b</sup>Oakland University, Department of Biological Sciences, 118 Library Drive, Rochester, MI 48309, U.S.A.

<sup>c</sup>Applied Genomics Laboratory, SCAMT Institute, ITMO University, Lomonosova 9 Str., Saint Petersburg 197101, Russia

<sup>d</sup>University of Puerto Rico at Mayagüez, Department of Marine Sciences, Call Box 9000, Mayagüez, PR 00681, U.S.A.

**Figure 1. Mitochondrial genome map of *Diadema antillarum*.** Arrow shapes are colored to indicate tRNA genes (blue), rRNA genes (red) and protein coding genes (green). The black rectangular shape refers to the non-coding control region or D loop. The directions of the arrows indicate direction of transcription on the H-strand (arrow points to the right) and L-strand (arrow points to the left). The map was generated in Geneious Prime v2022.1.1. The animal image is the specimen used for sampling in this study. Image taken by Alejandro Mercado Capote.

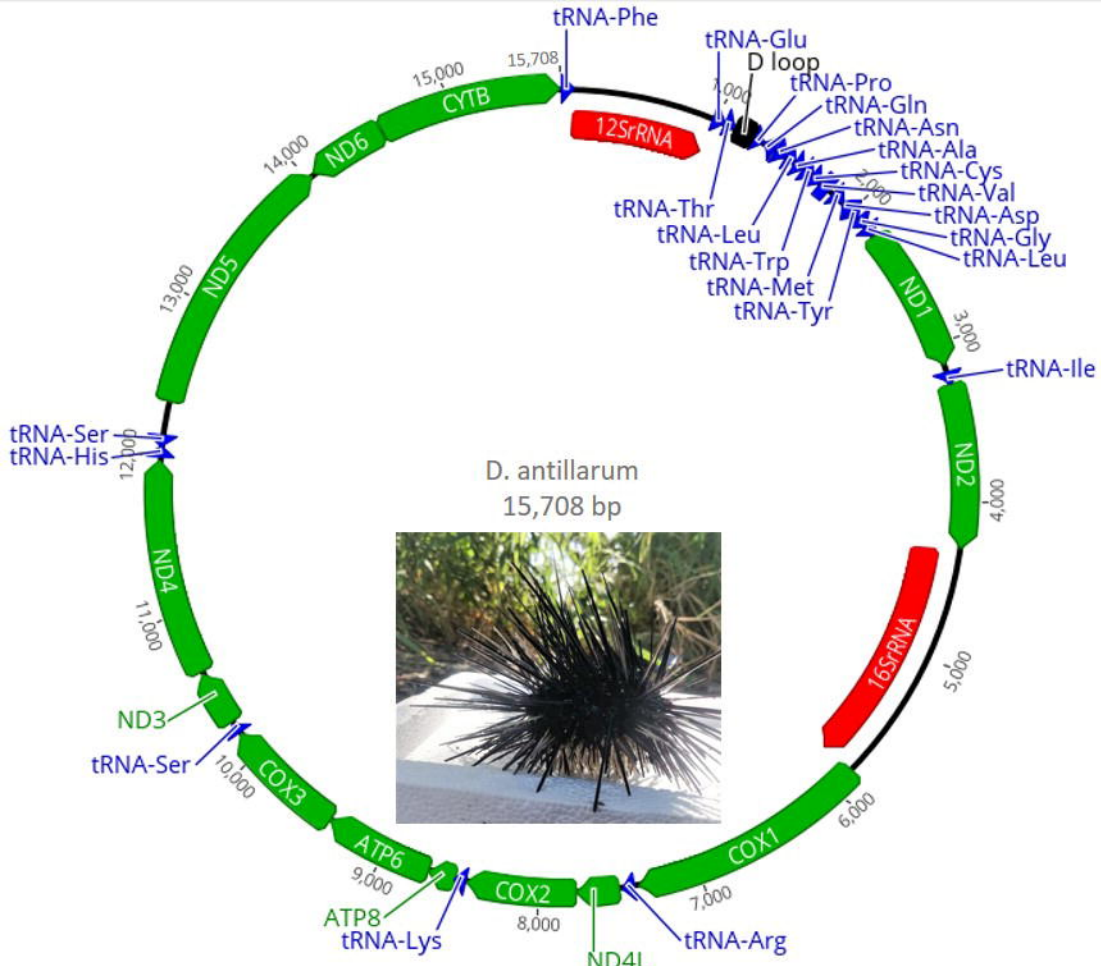

**The first complete mitochondrial genome of *Diadema antillarum* (Diadematoida,  
Diadematidae)**

Audrey J. Majeske<sup>a,b</sup>, Alejandro J. Mercado Capote<sup>a</sup>, Aleksey Komissarov<sup>c</sup>, Anna Bogdanova<sup>c</sup>, Nikolaos V. Schizas<sup>d</sup>, Stephanie O. Castro Márquez<sup>a</sup>, Kenneth Hilkert<sup>a</sup>, Walter Wolfsberger<sup>a</sup>, and Tarás K. Oleksyk<sup>a,b,\*</sup>

<sup>a</sup>University of Puerto Rico at Mayagüez, Department of Biology, Call Box 9000, Mayagüez, PR 00681, U.S.A.

<sup>b</sup>Oakland University, Department of Biological Sciences, 118 Library Drive, Rochester, MI 48309, U.S.A.

<sup>c</sup>Applied Genomics Laboratory, SCAMT Institute, ITMO University, Lomonosova 9 Str., Saint Petersburg 197101, Russia

<sup>d</sup>University of Puerto Rico at Mayagüez, Department of Marine Sciences, Call Box 9000, Mayagüez, PR 00681, U.S.A.

**Figure 2. Phylogenetic analysis of mitochondrial genomes indicates that *Diadema antillarum* is more closely related to *Echinothrix diadema* than to *D. setosum*.** A maximum likelihood consensus tree of sequences representing 12 sea urchin species and a sea cucumber (outgroup). Genbank accession numbers for taxa on the tree include: *H. crassispina* (KC479025.1, Jung, G. and Lee, Y.H., 2013, unpublished, direct submission), *S. purpuratus* (NC\_001453.1, Valverde et al., 1996, Qureshi, S.A., and Jacobs, H.T. 1993, Jacobs et al., 1988), *L. variegatus* (NC\_037785.1, Bronstein and Kroh 2018), *T. gratilla* (KY268294.1, Laruson 2017), *P. lividus* (J04815.1, Cantatore et al. 1989), *S. sphaeroides* (KU302103.1, Jung, G. and Lee, Y.H., 2013, unpublished, direct submission), *A. lixula* (X80396.1, De Giorgi et al., 1996), *E. calamaris* (NC\_050274.1, Wakayama et al., 2019), *D. setosum* (KX385835.1, Li et al., 2016), *E. diadema* (KX385836.1, Li et al., 2016, unpublished direct submission), *E. tribuloides* (MH614962.1, Kroh A., and Bronstein, O., 2018, unpublished direct submission) and *A. japonicus* (NC\_012616, Sun et al, 2010).



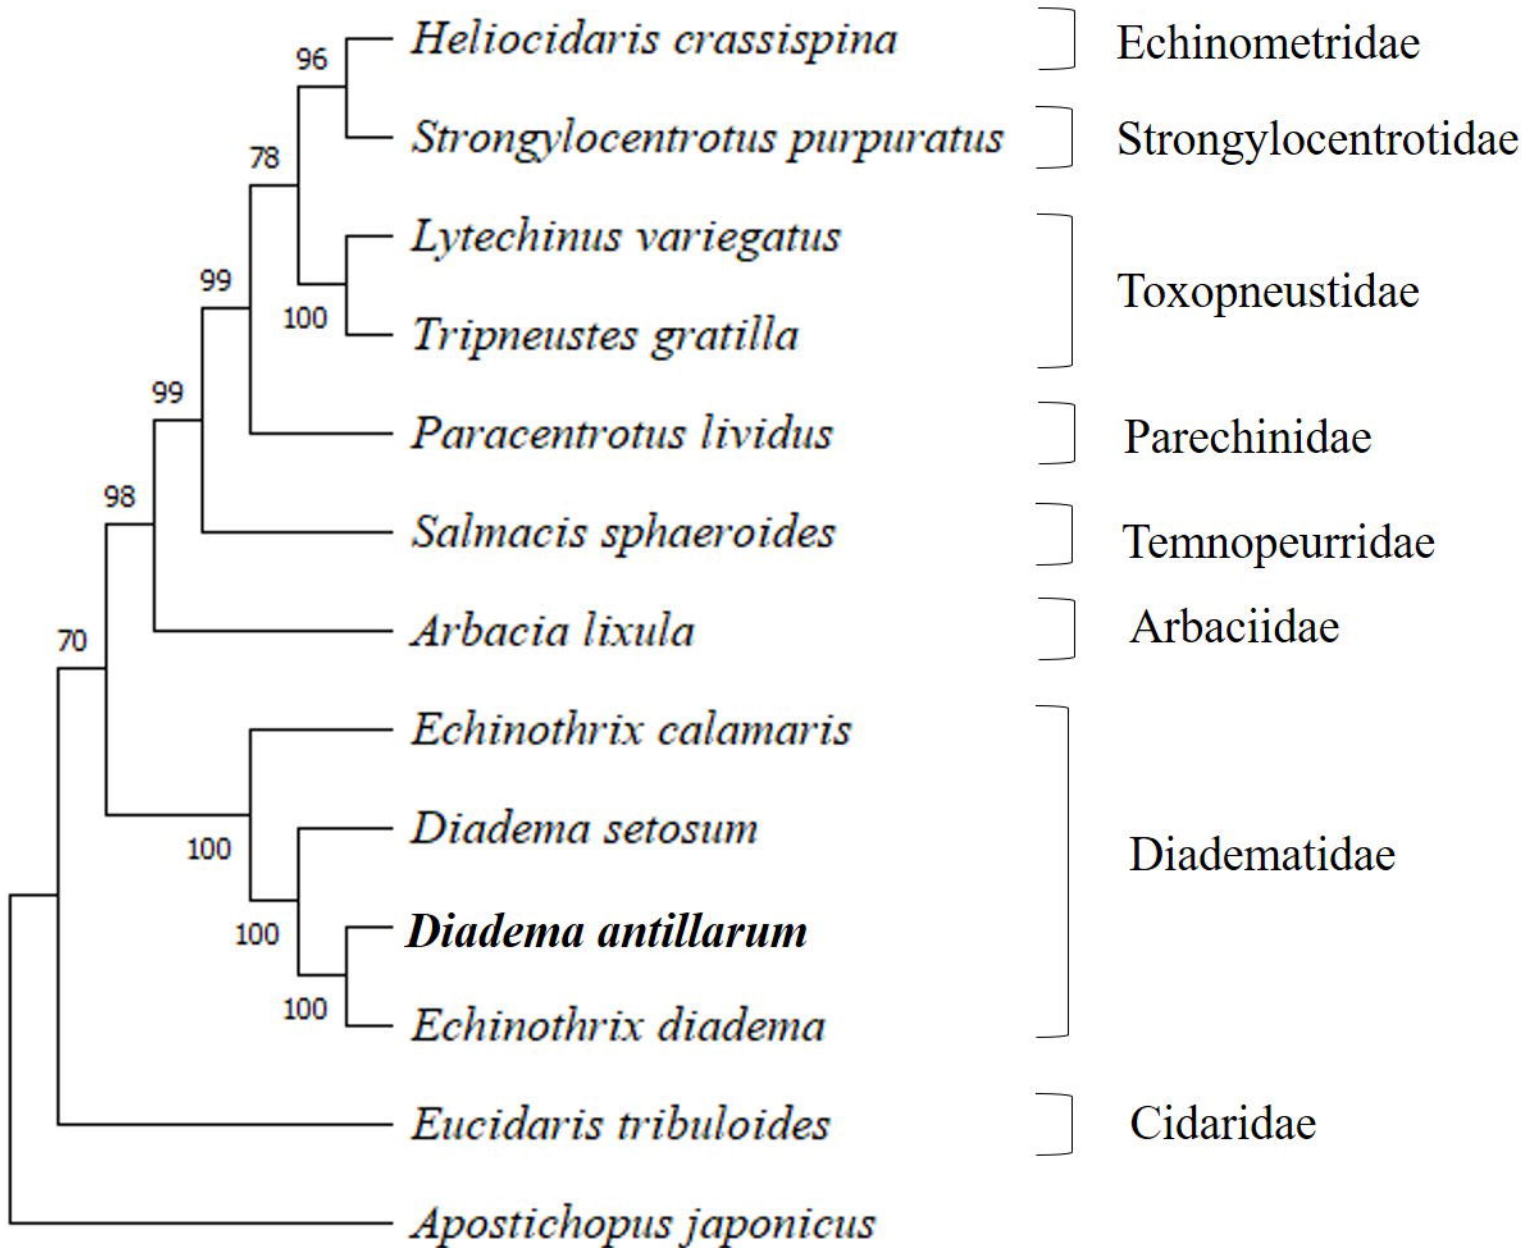

Source: https://www.biorxiv.org/content/10.1101/2022.10.05.510842v1.full.pdf
